# Supplementary material
Source: publisher figshare collection journal article supplement (https://iop.figshare.com/ndownloader/files/17069501)
Supplement: Supplementary file 1 [file 17069501]

### Capítulo 1
### Guilherme de Castro Oliveira
# Climate and soils at the Brazilian semiarid and the forest-Caatinga problem: new insights and implications for conservation

# load libraries
library(pacman);p_load(dplyr);p_load(caret);p_load(randomForest);p_load(Hmisc);p_load(vegan);p_load(factoextra); p_load(labgeo);p_load(MASS);p_load(rrcov)

# load data
dados = read.csv(file = './dados_para_analise_cap1.csv')

# define a pallette to vegetations and factors for vegt
levels(dados$vegt)
gr = dados$vegt
paleta = c('black', 'firebrick1', 'dodgerblue4','lightgreen')

# clusters dendrogram
clust = varclus(as.matrix(dados[,-c(1)]), similarity = 'pearson',trans = 'none')

# tiff(filename = '../imagens/Para o capitulo/hier_correlat.tif',res = 350,width = 4000, height = 2000)
plot(clust, cex=1.3, cex.axis =2 );correlationCut = 0.95;abline(1-correlationCut,0, col='red')
# dev.off()

# Remove highly correlated variables ( >= 0.95)
vc = dados %>% select_if(is.numeric) %>% high_correlation(cutoff = 0.95, verbose = T) # 6 variables to remove
dados = dados %>% dplyr::select(-one_of(vc)); names(dados)

# Split data in three groups
soil = dados[,1:17]
climate = dados[,c(1, 18:32)]
climSoil = dados

############################# Recursive Feature Elimination by dataset
# SOIL + CLIMATE
set.seed(333)
rfeALL = recursive_feature_elimination(df = climSoil,cpu_cores = 4, sizes = c(2:37))
rfe_result(rfeALL) # eight variables 
varsALL = predictors(rfeALL)[1:8]

# SOIL
set.seed(333)
rfeSOIL = recursive_feature_elimination(df = soil,cpu_cores = 4, sizes = c(2:17))
rfe_result(rfeSOIL) # nine variables
dev.off()
varsSOLO = predictors(rfeSOIL)[1:9]

#CLIMATE
set.seed(333)
rfeCLIMATE = recursive_feature_elimination(df = climate,cpu_cores = 4, sizes = c(2:14))
rfe_result(rfeCLIMATE) #six variables
varsCLIMA = predictors(rfeCLIMATE)[1:6]

# tiff(filename = '../imagens/Para o capitulo/LDAPLOTS.tif',res = 350,width = 4000, height = 2000)
par(mfrow=c(1,3))
########################################### LINEAR DISCRIMINANT ANALYSIS
m <- matrix(c(1,2,3,4,4,4),nrow = 2,ncol = 3,byrow = TRUE)
layout(mat = m,heights = c(0.4,0.4,0.2))
plot(1, type = "n", axes=FALSE, xlab="", ylab="")
plot_colors <- c("blue","black", "green", "orange", "pink")
legend('top',levels(gr),inset = 0, col = paleta, pch=19, cex = 1.2, pt.cex = 2, 
       ncol =4, bty  = 'n', x.intersp = 0.4, merge = F)

#################### LDA CLIMATE ATTRIBUTES
# Verify multivariate homogeneity of within-group covariance
env.pars = dados %>% dplyr::select(varsCLIMA)
env.parsd <- dist(env.pars)
(env.MHV <- betadisper(env.parsd, gr))

# Permutational test
set.seed(333);
permutest(env.MHV)  ## As variâncias dentro dos grupos não são homogêneas, p < 0.05

# variancias entre grupos não são homogeneas. padronizar dados
env.parsP = decostand(env.pars,method = 'standardize')
env.parsd2 <- dist(env.parsP)
(env.MHV2 <- betadisper(env.parsd2, gr))
# plot(env.MHV2,lwd = 0.1,ellipse = T,segments = F,label = F,lty = 0, ylim = c(-3,3), cex=1.2,main="Climate",col = c('firebrick1', 'black', 'dodgerblue4','darkgreen'))
# Permutational test para variáveis padronizadas
permutest(env.MHV2) # as variâncias dentro dos grupos são homogeneas!

# Wilks test para ver se as variaveis explanatorias tem medias diferentes
wt = Wilks.test(env.parsP, gr) #Medias dos grupos não sao iguais, pode seguir
env.pars3.df <- as.data.frame(env.parsP)
(spe.lda <- lda(gr ~., data = env.pars3.df))
summary(spe.lda)
spe.lda$means
(C <- spe.lda$scaling)

# lda plot
source("plot.lda.R") ## homemade function from numerical ecology, 2018
# plot.lda(spe.lda,plot.ell=F,col.env="orange", xlim = c(-3.5,3.5), ylim = c(-3,3),
#          groups = gr, plot.env = f,
#          plot.sites = 1,
#          plot.centroids = 1,
#          mul.coef = 1, colour.vec = paleta, pos.names = 3,
#          title="LDA for climate predictors")

# Computation of LDA - discrimination functions (on standardized
# variables
env.pars3.sc <- as.data.frame(scale(env.parsP))
spe.lda2 <- lda(gr ~ ., data = env.pars3.sc)
# Display the group means for the 3 variables
spe.lda2$means
# Extract the classification functions
(C2 <- spe.lda2$scaling)
# Compute the canonical eigenvalues
spe.lda2$svd^2
# Position the objects in the space of the canonical variates
(Fp2 <- predict(spe.lda2)$x)
# Classification of the objects
(spe.class2 <- predict(spe.lda2)$class)
(spe.post2 <- round(predict(spe.lda2)$posterior, 2))
(spe.table2 <- table(gr, spe.class2))
# Proportion of correct classification (classification success)
diag(prop.table(spe.table2, 1))
source("plot.lda.R")
# tiff(filename = '../imagens/Para o capitulo/LDA_CLIMA.tif',res = 350,width = 4000, height = 2000)
plot.lda(lda.out = spe.lda2,plot.ell=F,col.env="red",plot.env = F,
         groups = gr, xlim = c(-4,4), ylim = c(-4,4),
         plot.sites = 1,
         plot.centroids = 1,
         mul.coef = 1, colour.vec = paleta, pos.names = 3,
         title="");text(x = -4,y=10, "a")

legend(x = 4.5, y = 2.7,levels(gr), col = paleta, pch=19, cex = 1.2, pt.cex = 2, 
       ncol =1, bty  = 'n', x.intersp = 0.4, merge = F)
# dev.off()

# LDA with jackknife-based classification (i.e., leave-one-out
# cross-validation)
(spe.lda.jac <-
    lda(gr ~.,
        data = env.pars3.sc,
        CV = TRUE))
summary(spe.lda.jac)
# Numbers and proportions of correct classification
spe.jac.class <- spe.lda.jac$class
spe.jac.table <- table(gr, spe.jac.class)
# Classification success, validação
print(names(env.pars))
diag(prop.table(spe.jac.table, 1))
mean(diag(prop.table(spe.jac.table, 1)))

#################### LDA SOIL ATTRIBUTES
# Verify multivariate homogeneity of within-group covariance
env.pars = dados %>% dplyr::select(varsSOLO)
env.parsd <- dist(env.pars)
(env.MHV <- betadisper(env.parsd, gr))
# Permutational test
set.seed(333);
permutest(env.MHV)  ## As variâncias dentro dos grupos são homogêneas, p > 0.05
# variancias entre grupos não são homogeneas. padronizar dados
env.parsP = decostand(env.pars,method = 'standardize')
env.parsd2 <- dist(env.parsP)
(env.MHV2 <- betadisper(env.parsd2, gr))
# plot(env.MHV2,lwd = 0.1,ellipse = T,segments = F,label = F,lty = 0, ylim = c(-3,3), cex=1.2,main="Soil",col = c('firebrick1', 'black', 'dodgerblue4','darkgreen'))
# Permutational test para variáveis padronizadas
permutest(env.MHV2) # as variâncias dentro dos grupos são homogeneas!

# Wilks test para ver se as variaveis explanatorias tem medias diferentes
wt = Wilks.test(env.parsP, gr) #Medias dos grupos não sao iguais, pode seguir
env.pars3.df <- as.data.frame(env.parsP)
(spe.lda <- lda(gr ~., data = env.pars3.df))
summary(spe.lda)
spe.lda$means
(C <- spe.lda$scaling)

# lda plot
source("plot.lda.R") ## homemade function from numerical ecology 2018
# plot.lda(spe.lda,plot.ell=F,col.env="orange", #xlim = c(-3.5,3.5), ylim = c(-3,3),
#          groups = gr, plot.env = F, 
#          plot.sites = 1,
#          plot.centroids = 1,
#          mul.coef = 1, colour.vec = paleta, pos.names = 3,
#          title="LDA for soil predictors")
# boxplot(dados$dry.m.pre ~dados$vegt, main = 'dry.m.pre')

# Computation of LDA - discrimination functions (on standardized
# variables
env.pars3.sc <- as.data.frame(scale(env.parsP))
spe.lda2 <- lda(gr ~ ., data = env.pars3.sc)
# Display the group means for the 3 variables
spe.lda2$means
# Extract the classification functions
(C2 <- spe.lda2$scaling)
# Compute the canonical eigenvalues
spe.lda2$svd^2
# Position the objects in the space of the canonical variates
(Fp2 <- predict(spe.lda2)$x)

# Classification of the objects
(spe.class2 <- predict(spe.lda2)$class)
(spe.post2 <- round(predict(spe.lda2)$posterior, 2))
(spe.table2 <- table(gr, spe.class2))
# Proportion of correct classification (classification success)
diag(prop.table(spe.table2, 1))
source("plot.lda.R")
# tiff(filename = '../imagens/Para o capitulo/LDA_SOLO.tif',res = 350,width = 4000, height = 2000)
plot.lda(lda.out = spe.lda2,plot.ell=F,col.env="red", plot.env = F,
         groups = gr, xlim = c(-4,4),ylim = c(-4,4),
         plot.sites = 1,
         plot.centroids = 1,
         mul.coef = 3, colour.vec = paleta, pos.names = 3,
         title = '')

# legend(x = 5, y = 3.5,levels(gr), col = paleta, pch=19, cex = 1.2, pt.cex = 2, 
       # ncol =1, bty  = 'n', x.intersp = 0.4, merge = F)
# dev.off()
# LDA with jackknife-based classification (i.e., leave-one-out
# cross-validation)
(spe.lda.jac <-
    lda(gr ~.,
        data = env.pars3.sc,
        CV = TRUE))
summary(spe.lda.jac)
# Numbers and proportions of correct classification
spe.jac.class <- spe.lda.jac$class
spe.jac.table <- table(gr, spe.jac.class)
# Classification success, validação
print(names(env.pars))
diag(prop.table(spe.jac.table, 1))
mean(diag(prop.table(spe.jac.table, 1)))

#################### LDA CLIMATE+SOIL ATTRIBUTES
# Verify multivariate homogeneity of within-group covariance
env.pars = dados %>% dplyr::select(varsALL)
env.parsd <- dist(env.pars)
(env.MHV <- betadisper(env.parsd, gr))
# Permutational test
set.seed(333)
permutest(env.MHV)  ## As variâncias dentro dos grupos não são homogêneas, p < 0.05
# variancias entre grupos não são homogeneas. padronizar dados
env.parsP = decostand(env.pars,method = 'standardize')
env.parsd2 <- dist(env.parsP)
(env.MHV2 <- betadisper(env.parsd2, gr))
# plot(env.MHV2,lwd = 0.1,ellipse = T,segments = F,label = F,lty = 0, ylim = c(-3,3), cex=1.2,main="Climate",col = c('firebrick1', 'black', 'dodgerblue4','darkgreen'))
# Permutational test para variáveis padronizadas
permutest(env.MHV2) # as variâncias dentro dos grupos são homogeneas!

# Wilks test para ver se as variaveis explanatorias tem medias diferentes
wt = Wilks.test(env.parsP, gr) #Medias dos grupos não sao iguais, pode seguir
env.pars3.df <- as.data.frame(env.parsP)
(spe.lda <- lda(gr ~., data = env.pars3.df))
summary(spe.lda)
spe.lda$means
(C <- spe.lda$scaling)

# lda plot
source("plot.lda.R") ## homemade function from numerical ecology 2018
# # plot.lda(spe.lda, plot.ell=F, col.env="orange", xlim = c(-3.5,3.5), ylim = c(-3,3),
#          groups = gr, plot.env=F,
#          plot.sites = 1,
#          plot.centroids = 1,
#          mul.coef = 1, colour.vec = paleta, pos.names = 3,
#          title="LDA for climate and soil predictors")


# Computation of LDA - discrimination functions (on standardized
# variables
env.pars3.sc <- as.data.frame(scale(env.parsP))
spe.lda2 <- lda(gr ~ ., data = env.pars3.sc)
# Display the group means for the 3 variables
spe.lda2$means
# Extract the classification functions
(C2 <- spe.lda2$scaling)
# Compute the canonical eigenvalues
spe.lda2$svd^2
# Position the objects in the space of the canonical variates
(Fp2 <- predict(spe.lda2)$x)
# Classification of the objects
(spe.class2 <- predict(spe.lda2)$class)
(spe.post2 <- round(predict(spe.lda2)$posterior, 2))
(spe.table2 <- table(gr, spe.class2))
# Proportion of correct classification (classification success)
diag(prop.table(spe.table2, 1))
source("plot.lda.R")
# tiff(filename = '../imagens/Para o capitulo/LDA_CLIMAeSOLO.tif',res = 350,width = 4000, height = 2000)
plot.lda(lda.out = spe.lda2,plot.ell=F,col.env="red", plot.env = F,
         groups = gr, xlim = c(-4,4), ylim=c(-4,4),
         plot.sites = 1,
         plot.centroids = 1,
         mul.coef = 3, colour.vec = paleta, pos.names = 3,
         title="")

legend(x = 4.5, y = 2.7,levels(gr), col = paleta, pch=19, cex = 1.2, pt.cex = 2, 
       ncol =1, bty  = 'n', x.intersp = 0.4, merge = F)
dev.off()

# LDA with jackknife-based classification (i.e., leave-one-out
# cross-validation)
(spe.lda.jac <-
    lda(gr ~.,
        data = env.pars3.sc,
        CV = TRUE))
summary(spe.lda.jac)

# Numbers and proportions of correct classification
spe.jac.class <- spe.lda.jac$class
spe.jac.table <- table(gr, spe.jac.class)
# Classification success, validação
print(names(env.pars))
diag(prop.table(spe.jac.table, 1))
mean(diag(prop.table(spe.jac.table, 1)))

#############################################################
#################### PCA
pca = prcomp(env.parsP, scale. = T)
fviz_pca_biplot(pca, axes = c(1,2), habillage= gr, label = 'var',
                col.var ='black', repel = T, legend.title='Vegetation',
                addEllipses = T,ellipse.level=0.75, palette = c('black', 'firebrick1', 'dodgerblue4','darkgreen')) + theme_gray(base_size = 15)

################### QDA (only for test)
spe.qda2 <- qda(gr ~ ., data = env.pars3.sc)
library(klaR)
partimat(gr ~ ., data = env.pars3.sc,method="lda")


################## RANDOM FORESTS
# RUN RANDOM FOREST 100 TIMES
p_load(e1071)
dn = dados %>% dplyr::select(vegt, varsALL)# solo e clima, variáveis pré-selecionads
kappa = numeric(100)
accuracy = numeric(100)
accuracyHiperx = numeric(100)
accuracyHipox = numeric(100)
accuracyCerrado = numeric(100)
accuracyFloDec = numeric(100)

confMat = matrix(0,4,4) # matriz de confusão
set.seed(333)
for(i in seq(1:100)){
  # SEPARAR DADOS DE TREINO E VALIDAÇÃO
  vt = createDataPartition(dn$vegt, p = 0.80, list = F)
  # CRIAR DOIS VETORES, UM COM AMOSTRAS PARA TREINO (80% DOS DADOS) E OUTRO PARA VALIDACAO.
  treino = dn[vt,]
  valida = dn[-vt,]
  # TREINAR MODELO
  formula = as.formula(vegt ~.)
  fit.rf = randomForest(formula, data = treino, na.action = na.omit, ntree=500)
  # IMPORTANCIA DAS VARIAVEIS
  # varImpPlot(fit.rf, scale = 3); importance(fit.rf)
  # Predizendo as amostras de validação e calculando o kappa
  v = predict(fit.rf,valida)
  (a = confusionMatrix(v,valida$vegt))
  confMat = confMat + a$table
  
  kappa[i] = a$overall[[2]];# 'KAPPA' 
  accuracy[i] = a$overall[[1]];#'ACCURACY'
  accuracyHiperx[i] = a$byClass[,11][[1]]; #'Balanced accuracy hiperx'
  accuracyHipox[i] = a$byClass[,11][[2]]; #'hipox'
  accuracyCerrado[i] = a$byClass[,11][[3]]; #'cerrado'
  accuracyFloDec[i] = a$byClass[,11][[4]]; #'flodec'
}

min(accuracy); mean(accuracy); max(accuracy); sd(accuracy)
min(kappa); mean(kappa); max(kappa); sd(kappa)

# ac.clima = cbind(accuracy, rep('C', 100))
# ac.solo = cbind(accuracy, rep('S', 100))
# ac.all = cbind(accuracy, rep('C+S', 100))

kp.clima = cbind(kappa, rep('C', 100))
kp.solo = cbind(kappa, rep('S', 100))
kp.all = cbind(kappa, rep('C+S', 100))

acc = as.data.frame(rbind(ac.clima, ac.solo, ac.all), stringsAsFactors = F)
acc$accuracy = as.numeric(acc$accuracy, dec = 5)
acc$V2 = as.factor(acc$V2)

kpp = as.data.frame(rbind(kp.clima, kp.solo , kp.all), stringsAsFactors = F)
kpp$kappa = as.numeric(kpp$kappa, dec = 5)
kpp$V2 = as.factor(kpp$V2)

boxplot(acc$accuracy ~ acc$V2)
boxplot(kpp$kappa ~ kpp$V2)

boxplerk(acc$accuracy, acc$V2)
boxplerk(kpp$kappa, kpp$V2)
hist(acc$accuracy)

kpp %>% group_by(V2) %>% mean(kpp$kappa)
